# Supplementary material
Source: Research Square preprint supplement (doi:10.21203/rs.3.rs-8609478/v1)
Supplement: Supplementary file 1 [file 240c95e7f82c6380534a0f21.docx]

Table 1 Nursing Operation Time Points Division

| **Time Point** | **Urinary Catheterization** | **Oral Care** | **Bed bathing** | **Cardiopulmonary Resuscitation (CPR)** | **Bed Making** |
| --- | --- | --- | --- | --- | --- |
| 1 | Verify patient information | Verify patient information | Verify patient information | Assess environmental safety and patient's consciousness | Assess the performance of the bed and the environment |
| 2 | Assess the patient's condition and explain the purpose of the operation | Assess the patient's condition and explain the purpose of the operation | Assess the patient's condition and explain the purpose of the operation | External chest compression | Remove bedside table, chair, and sweep the bed |
| 3 | Position the patient | Position the patient | Position the patient | Open the airway | Spread the bottom sheet |
| 4 | Preliminary disinfection | Oral cleaning | Wiping of the upper limbs | Artificial respiration | Put the quilt into the quilt cover |
| 5 | Re-disinfection | Communicate with the patient and arrange the bed unit | Wiping of the back | Take measurements, arrange the bed unit | Put the pillow into the pillowcase |
| 6 | Intubation | - | Wiping of the lower limbs | - | arrange the bed unit |
| 7 | Secure the catheter and urine bag | - | Communicate with the patient and arrange the bed unit | - | - |
| 8 | arrange the bed unit | - | - | - | - |

Note: “-” indicates that the operation does not involve this time point.
