# Supplementary material
Source: Research Square preprint supplement (doi:10.21203/rs.3.rs-8609478/v1)
Supplement: Supplementary file 2 [file 5c936948ecd61322045870d0.docx]

# Table 2 Posture Risk Analysis of Nursing Procedures

| **Nursing Procedure** | **Time Point** | **Number of Images Analyzed** | **Description of Task** | **Mean Hazard Score (Mean**±SD**)** | **Poor Posture Rate (%)** |
| --- | --- | --- | --- | --- | --- |
| Urinary Catheterization | 1 | 1057 | Verify patient information | 1.8±0.3 | 92.2 |
|  | 2 | 615 | Assess the patient’s condition and explain the operation purpose | 2.2±0.3 | 63.0 |
|  | 3 | 1367 | Position the patient | 2.2±0.2 | 92.6 |
|  | 4 | 2869 | Preliminary disinfection | 2.1±0.2 | 86.1 |
|  | 5 | 3169 | Re-disinfection | 2.0±0.2 | 82.3 |
|  | 6 | 2576 | Intubation | 2.2±0.3 | 96.8 |
|  | 7 | 897 | Secure the catheter and urine bag | 2.4±0.2 | 94.5 |
|  | 8 | 1157 | Arrange the bed unit | 2.2±0.2 | 83.3 |
|  | Total | 13607 | — | — | 83.7 |
| Oral Care | 1 | 944 | Verify patient information | 1.9±0.4 | 35.6 |
|  | 2 | 452 | Assess the patient’s condition and explain the operation purpose | 2.2±0.3 | 60.4 |
|  | 3 | 852 | Position the patient | 2.1±0.3 | 64.4 |
|  | 4 | 7640 | Oral cleaning | 2.0±0.2 | 85.3 |
|  | 5 | 1045 | Communicate with the patient and arrange the bed unit | 2.1±0.3 | 72.4 |
|  | Total | 10933 | — | — | 77.1 |
| Warm Water Sponge Bath | 1 | 819 | Verify patient information | 1.9±0.4 | 31.5 |
|  | 2 | 591 | Assess the patient’s condition and explain the operation purpose | 2.1±0.4 | 43.0 |
|  | 3 | 407 | Position the patient | 2.3±0.2 | 70.0 |
|  | 4 | 3341 | Wiping of the upper limbs | 2.0±0.2 | 79.6 |
|  | 5 | 3029 | Wiping of the back | 2.1±0.2 | 81.9 |
|  | 6 | 5466 | Wiping of the lower limbs | 2.0±0.2 | 80.5 |
|  | 7 | 1219 | Communicate with the patient and arrange the bed unit | 1.9±0.3 | 55.9 |
|  | Total | 14872 | — | — | 74.4 |
| CPR | 1 | 935 | Assess environmental safety and patient’s consciousness | 2.1±0.2 | 72.5 |
|  | 2 | 1942 | External chest compression | 2.1±0.1 | 98.9 |
|  | 3 | 580 | Open the airway | 2.4±0.2 | 97.8 |
|  | 4 | 864 | Artificial respiration | 2.3±0.2 | 93.3 |
|  | 5 | 1299 | Take measurements and arrange the bed unit | 2.2±0.3 | 79.6 |
|  | Total | 5620 | — | — | 89.0 |
| Bed Making | 1 | 158 | Assess the performance of the bed and the environment | 2.3±0.3 | 13.9 |
|  | 2 | 81 | Remove bedside table, chair, and sweep the bed | 2.5±0.1 | 55.0 |
|  | 3 | 2726 | Spread the bottom sheet | 2.3±0.2 | 95.5 |
|  | 4 | 4666 | Put the quilt into the quilt cover | 2.2±0.2 | 95.1 |
|  | 5 | 680 | Put the pillow into the pillowcase | 2.0±0.3 | 48.0 |
|  | 6 | 214 | Arrange the bed unit | 2.4±0.1 | 80.8 |
|  | Total | 8525 | — | — | 89.1 |
